# Supplementary material
Source: publisher site journal article supplement (https://www.spandidos-publications.com/7306/downloadSupplementary)

Figure S1. Effects of AGE on ENSC capacity to form neurospheres. (A) Neurosphere assays were performed to determine the effects of AGE on ENSCs isolated ‘Young’ or ‘Old’ mice. (B) ‘Old’ mice-derived ENSCs were grown in the presence of AGE. Results are shown as mean  $\pm$  SEM, n=3/group. \*P<0.05, \*\*P<0.01, \*\*\*P<0.001. AGE, aged garlic extract; ENSC, enteric neural stem cells.

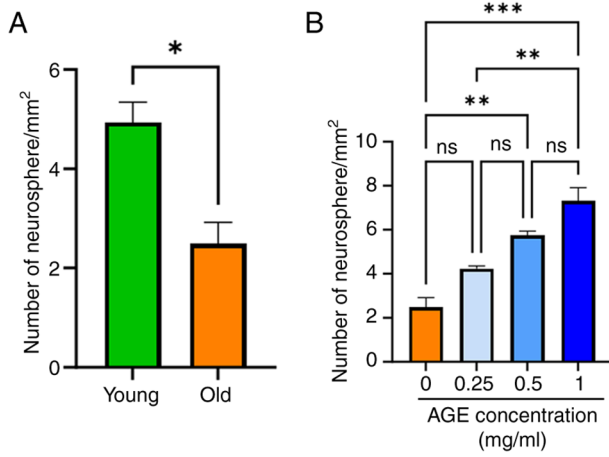

Supplement: Supplementary file 1 [file downloadSupplementary]
